# Supplementary material for: Design and research of a self-activated orange magnesium boron nitride phosphor with its application in W-LEDs
Source: Royal Society of Chemistry journal article supplement (doi:10.1039/c8dt03438a), 2018-01-01
Supplement: c8dt03438a1.pdf [file c8dt03438a1.pdf]

**Supplementary Information**

**Design and Research of a Self-activated Orange Magnesium Boron Nitride  
Phosphor with its Application in W-LEDs**

**Junyi Li, Jianyan Ding, Bo Ma, Zhengyan Zhao, Yuhua Wang**

**Table S1** The biexponential fitting parameters and the calculated average lifetimes( $\tau$ )

| Monitored peak/nm | $\tau_1$ /ns | $\tau_2$ /ns | $A_1$   | $A_2$    | $\tau$ /ns |
|-------------------|--------------|--------------|---------|----------|------------|
| 600               | 780          | 95           | 130.91  | 1614.267 | 368.80     |
| 617               | 1000         | 105          | 104.723 | 1472.835 | 466.36     |
| 692               | 1127         | 101          | 117.308 | 1320.153 | 611.81     |

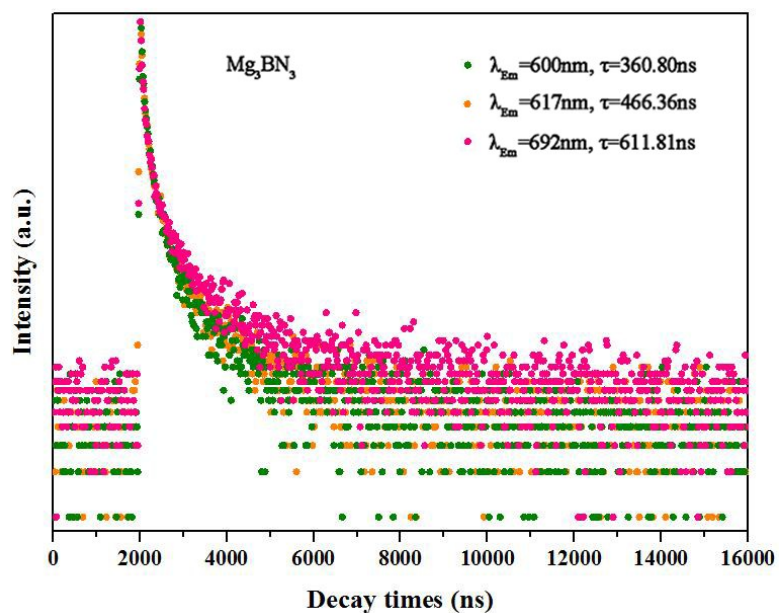

**Fig. S1** The combined decay curves of  $\text{Mg}_3\text{BN}_3$  at different emission peaks.

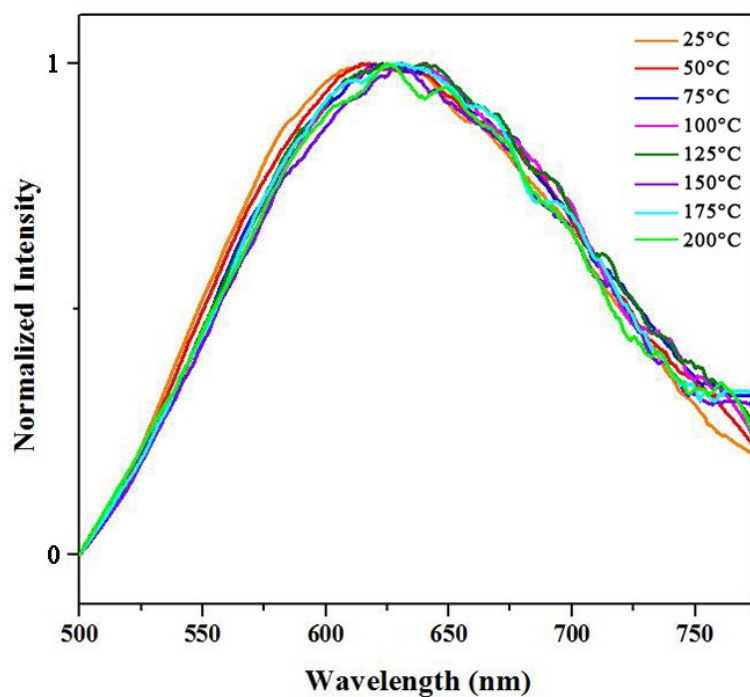

**Fig. S2** The normalized temperature dependence of the emission spectra of  $\text{Mg}_3\text{BN}_3$
